# Supplementary material
Source: MDPI journal article supplement (https://www.mdpi.com/2071-1050/11/3/654)

**Supplementary Table S1.** Reclassification of the European Space Agency (ESA) Land cover map for this study. Land cover classes shown in the same color were merged together for spatial analysis in this study.

| Original ESA Land Cover Classes                                       | Reclassified Land Cover Classes |
|-----------------------------------------------------------------------|---------------------------------|
| 10; Cropland                                                          | Arable Land                     |
| 11; Herbaceous cover;255;255;100                                      |                                 |
| 12; Tree or shrub cover;255;255;0                                     | Vegetation cover (tree/shrub)   |
| 20; Cropland                                                          |                                 |
| 30; Mosaic cropland (>50%) / natural vegetation (tree                 | Urban Area                      |
| 40; Mosaic natural vegetation (tree                                   |                                 |
| 50; Tree cover                                                        | Bare Area                       |
| 60; Tree cover                                                        |                                 |
| 70; Tree cover                                                        | Body of Water                   |
| 100; Mosaic tree and shrub (>50%) / herbaceous cover (<50%);140;160;0 |                                 |
| 110; Mosaic herbaceous cover (>50%) / tree and shrub (<50%);190;150;0 |                                 |
| 120; Shrubland;150;100;0                                              |                                 |
| 122; Shrubland deciduous;150;100;0                                    |                                 |
| 130; Grassland;255;180;50                                             |                                 |
| 150; Sparse vegetation (tree                                          |                                 |
| 180; Shrub or herbaceous cover                                        |                                 |
| 190 ;Urban areas;195;20;0                                             |                                 |
| 200; Bare areas;255;245;215                                           |                                 |
| 201; Consolidated bare areas;220;220;220                              |                                 |
| 202; Unconsolidated bare areas;255;245;215                            |                                 |
| 210; Water bodies;0;70;200                                            |                                 |

22

23 **Supplementary Figure S1.** Domicile location of respondents interviewed in the study area.

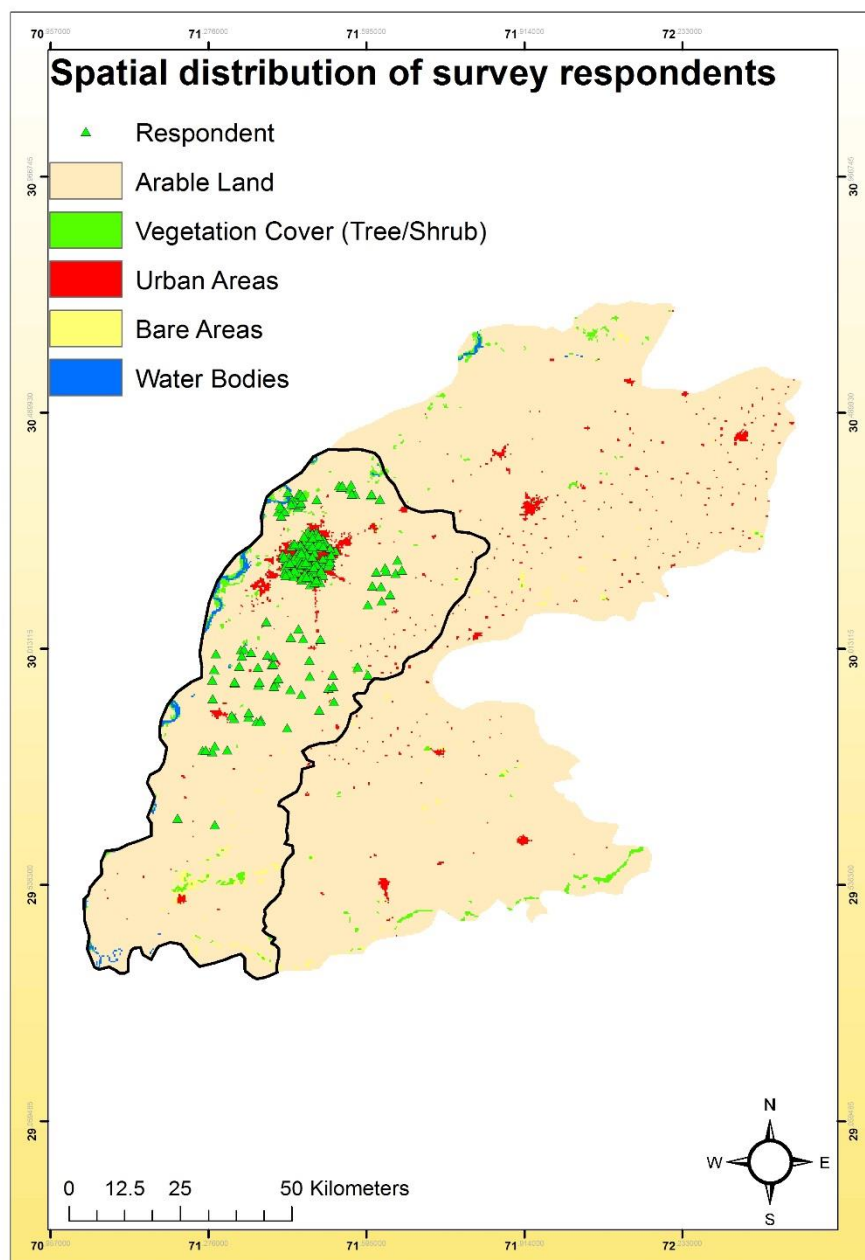

24

25

26

27

28

29

30

31

32

33

34

35

36

**Supplementary Figure S2.** Contribution to net change of land use observed in Multan region between 2002-2015(in hectares)

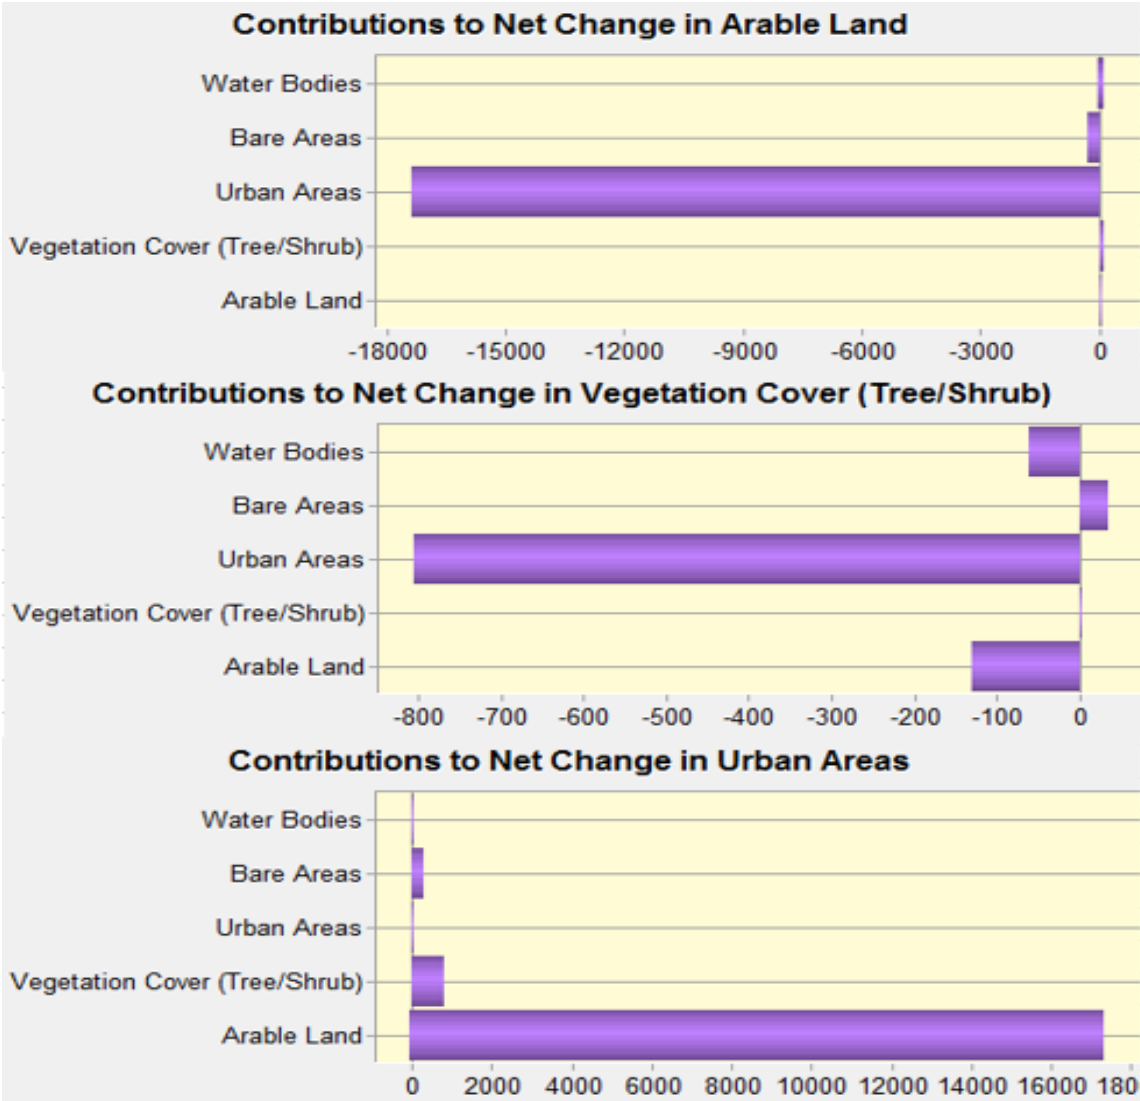

**Supplementary Figure S3.** Map of the study area showing gain/loss in the land area under the land cove classes, a) urban areas, b) arable land, and c) vegetation cover (tree/shrub) during 2002-2015.

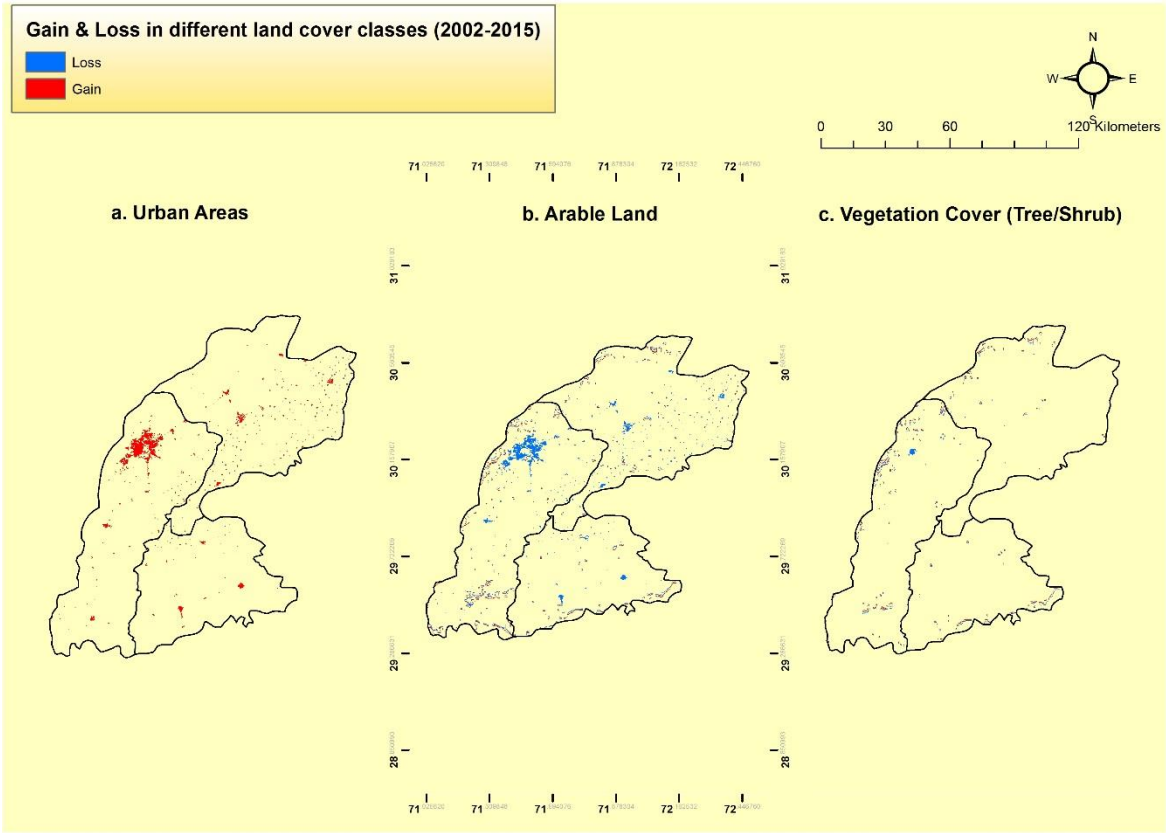

88 **Figure S4.** Bar Chart showing mean responses within each demographic category to the questions on whether the respondents have observed changes in the  
 89 ecosystem services in the study area.

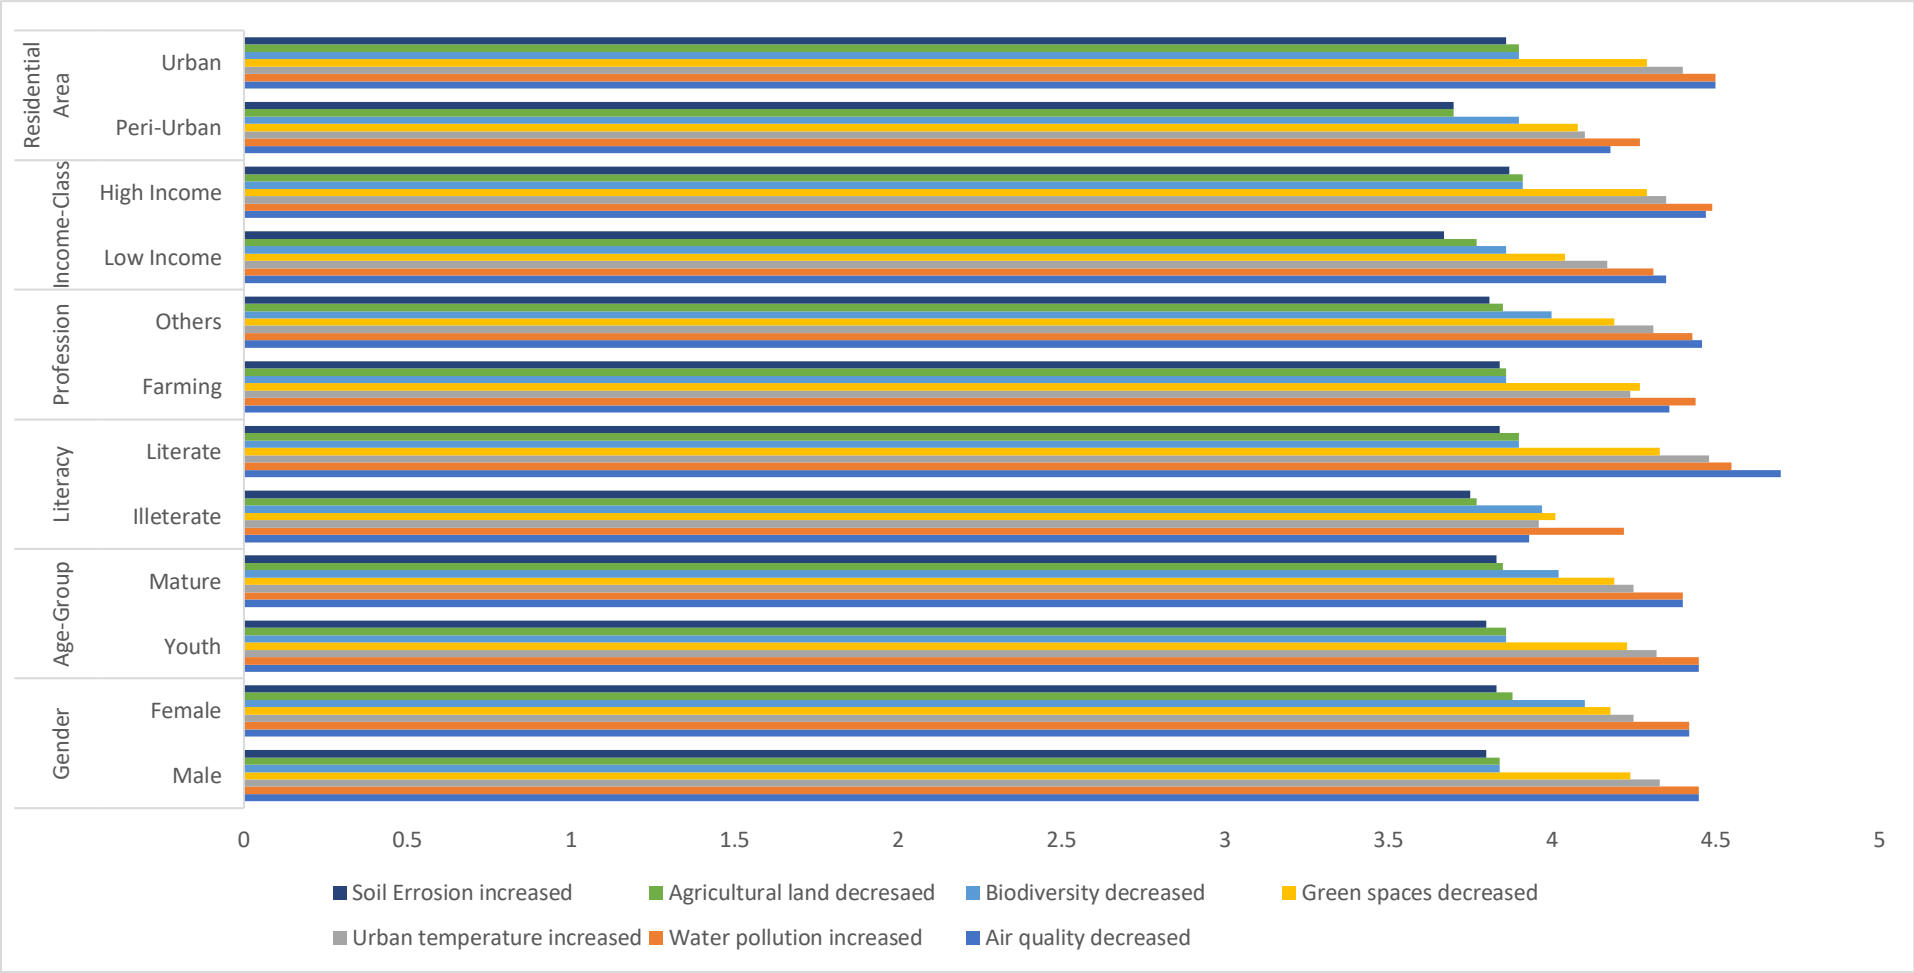

92 **Figure S5.** Bar Chart showing mean responses within each demographic category to the questions on whether urban sprawl is responsible for changes in  
 93 ecosystem services in the study area.

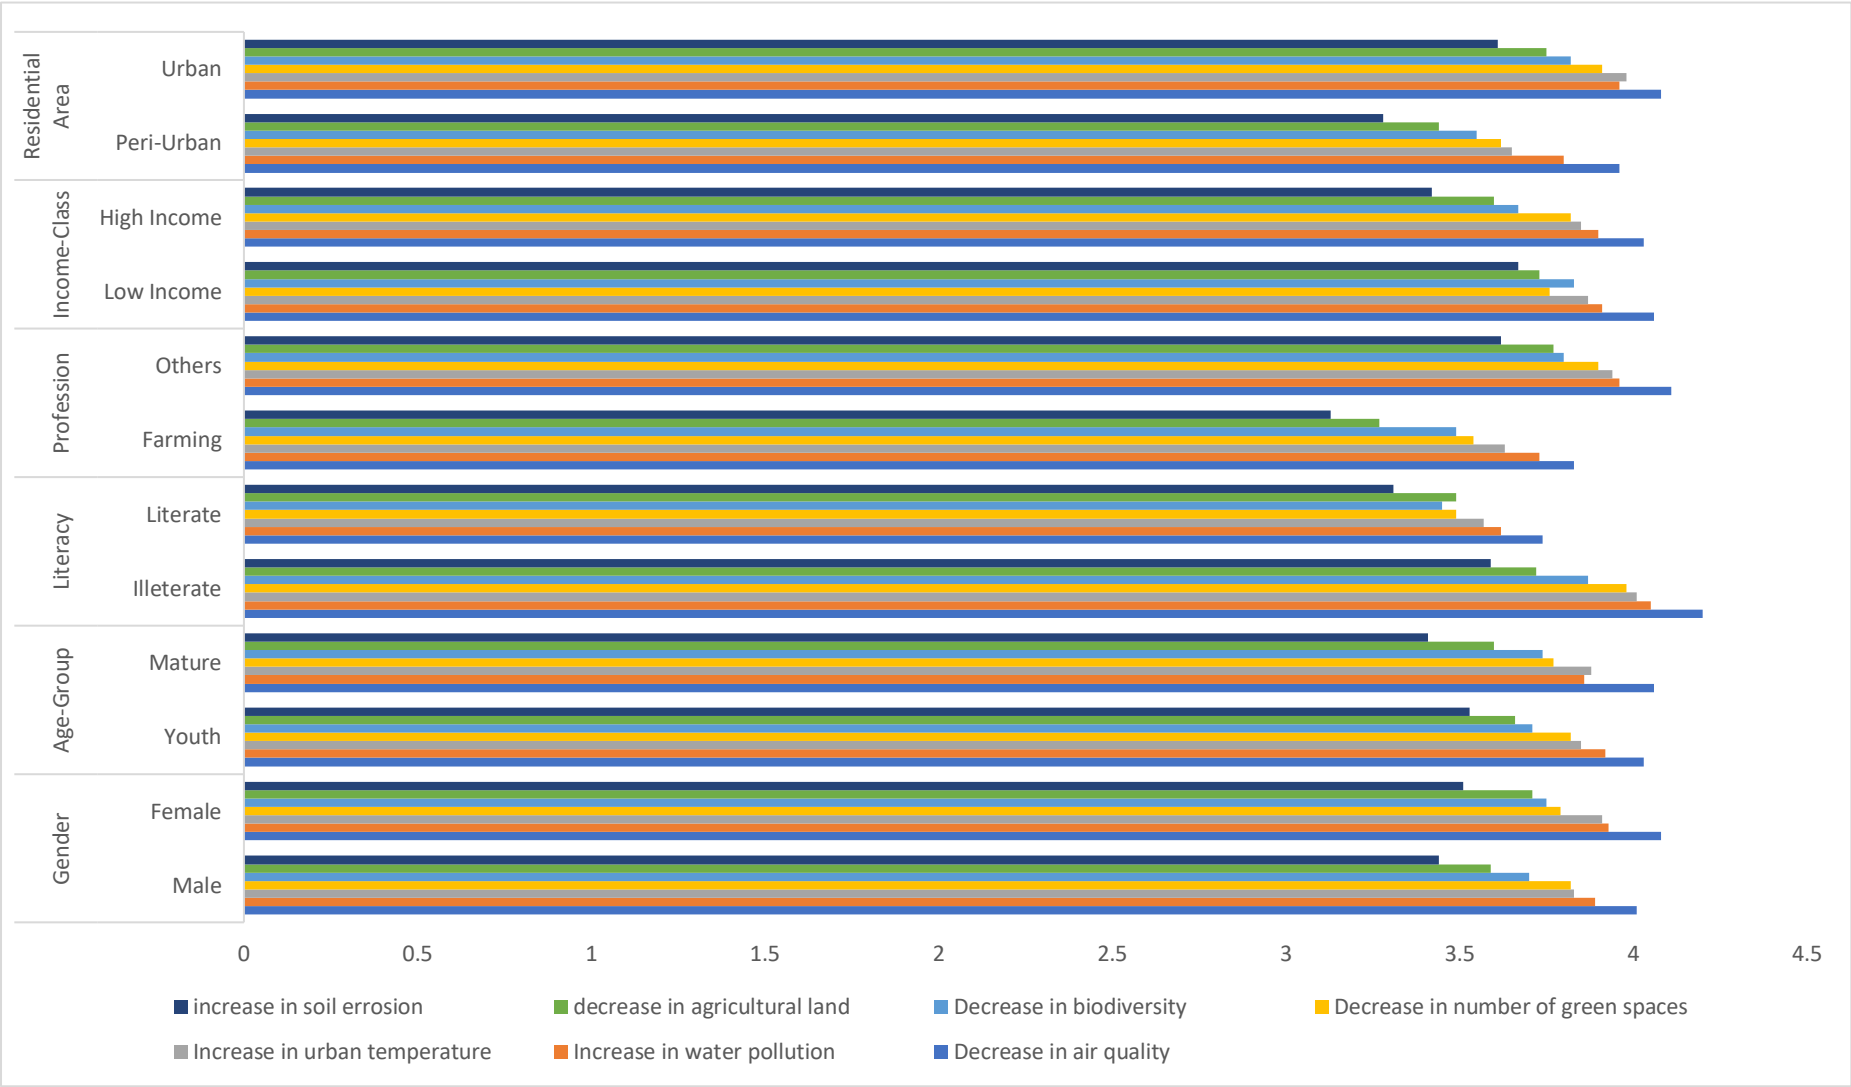

Supplement: s1 [file s1]
